# Supplementary figures and images for: Glucocorticoid/Adiponectin Axis Mediates Full Activation of Cold-Induced Beige Fat Thermogenesis
Source: MDPI journal article supplement (doi:10.3390/biom11111573), 2021-10-23

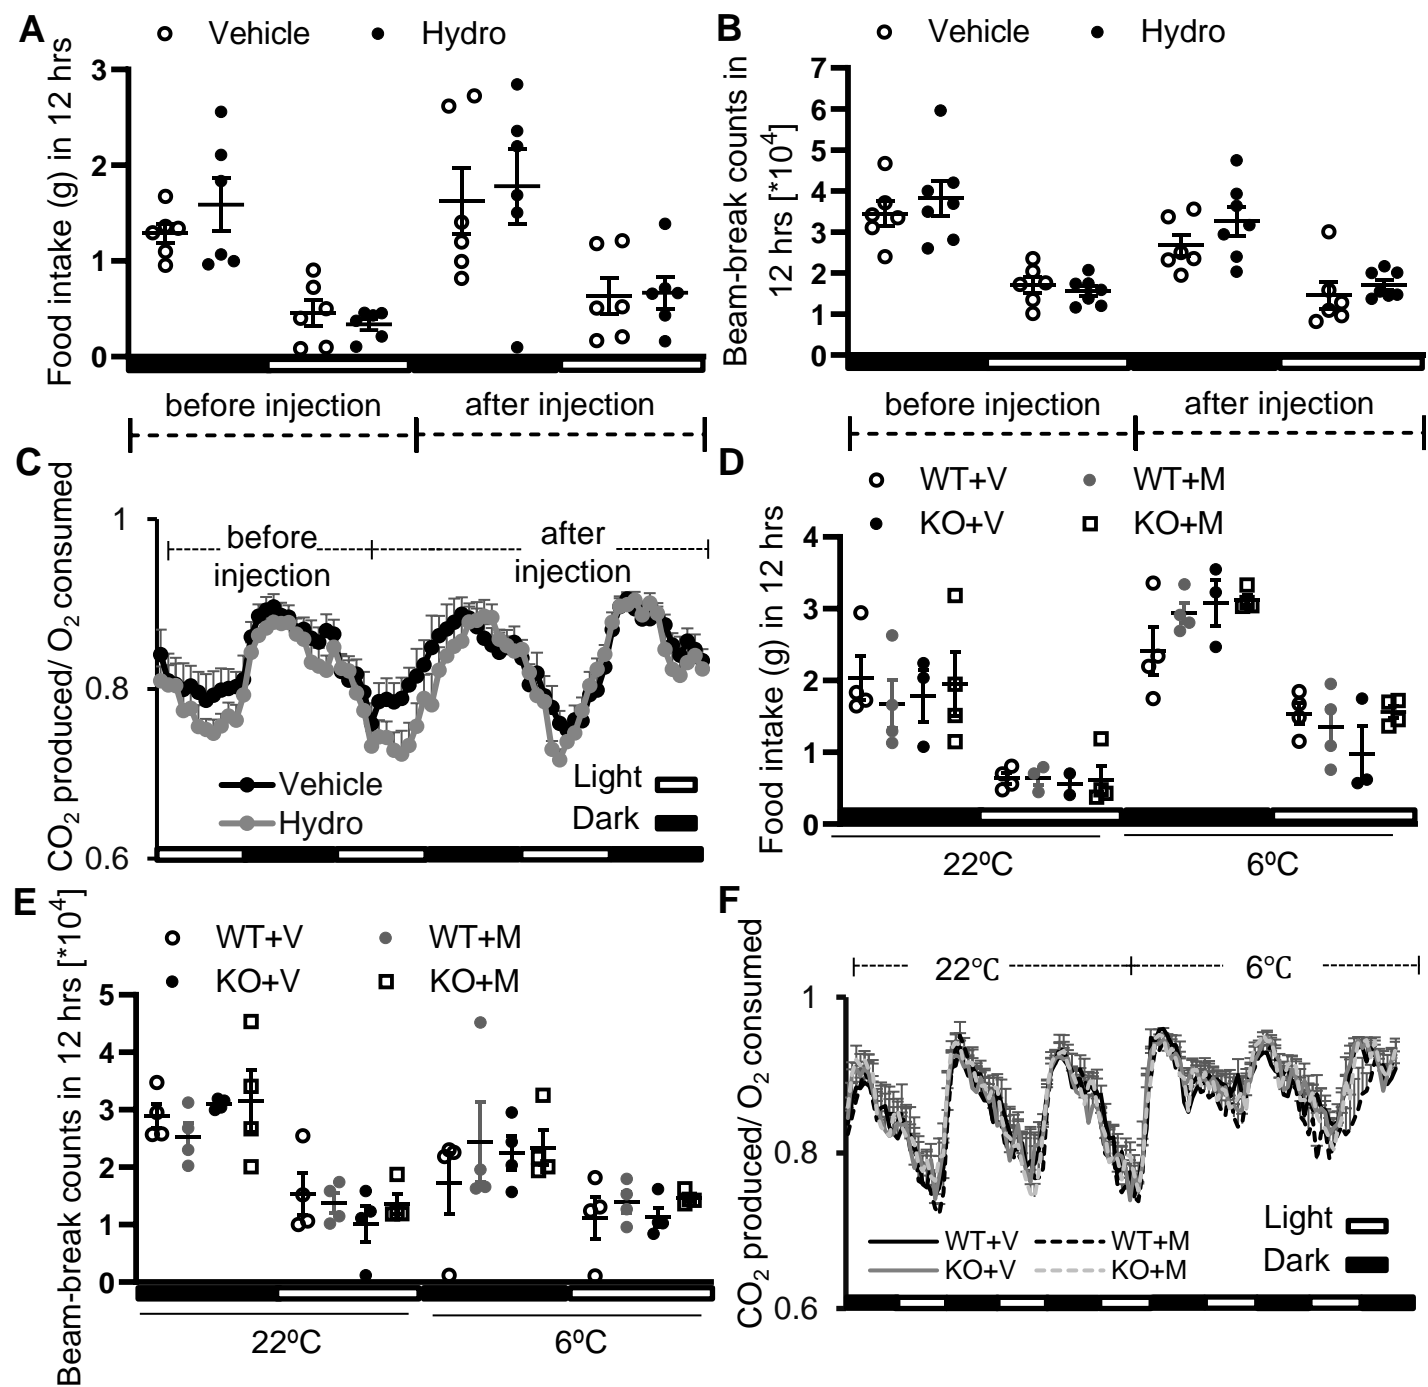

Fig.S1

Supplement: s1 [file s1]
